# Supplementary material for: Global approaches to postmortem genetic testing after sudden cardiac death in the young: A survey among healthcare professionals
Source: medRxiv preprint, doi:10.1101/2020.12.23.20248816, version 1 (2020-12-26)
Supplement: Supplementary table 1 [file 248816_file03.docx]

**Supplementary Material S1**

*Lieke M. van den Heuvel, Do, Laura Yeates, Heather MacLeod, Cynthia A. James, Johan Duflou, Jonathan R. Skinner, Christopher Semsarian, J. Peter van Tintelen, Jodie Ingles. Global approaches to postmortem genetic testing after sudden cardiac death in the young: A survey among healthcare professionals*

| **S Table 1** Professional organizations asked for recruitment of patient sample |
| --- |
| **Patient organizations** |
| **American** |
| National Society of Genetic Counselors (NSGC) |
|  |
| **European** |
| European Reference Network of cardiogenetics (ERN) |
| European Society of Human Genetics (ESHG) |
| Dutch Working group of Cardiogenetics (VKGN) |
| British Society for Genetic Medicine (BSGM) |
|  |
| **Australian** |
| Australian Society of Genetic Counselors (ASGC) |
| Human Genetics Society of Australasia (HSGA) |
| Cardiovascular Genetics Flagship |
|  |
| **Asian** |
| Human Genetics Society of Australasia (HSGA) |
